# Supplementary material for: Enzymolytic Lignin-Derived N-S Codoped Porous Carbon Nanocomposites as Electrocatalysts for Oxygen Reduction Reactions
Source: MDPI journal article supplement (doi:10.3390/ma16247614), 2023-12-12
Supplement: s1 [file s1]

# Supporting information

## Impact of different lignin sources on nitrogen-doped porous carbon toward the electrocatalytic oxygen reduction reaction

Zheng Li <sup>1</sup>, Yuwei Feng <sup>1</sup>, Xia Qu <sup>1</sup>, Yantao Yang <sup>1,2</sup>, Lili Dong<sup>1,2</sup>, Tingzhou Lei <sup>1,2\*</sup>, Suxia Ren <sup>1,2\*</sup>

<sup>1</sup> Institute of Urban & Rural Mining, Changzhou University, Changzhou 213164, China; s21020856156@mail.cczu.cn (Z.L.); s21020856056@mail.cczu.cn (Y.F.); s21020856027@mail.cczu.cn (X.Q.); yyt@cczu.edu.cn (Y.Y.); dongli2050@cczu.edu.cn (L.D.); leitingzhou@cczu.edu.cn (T.L.)

<sup>2</sup> Changzhou Key Laboratory of Biomass Green, Safe & High Value Utilization Technology, Changzhou 213164, China

\* Correspondence: rensuxia@cczu.edu.cn (S.R.); leitingzhou@cczu.edu.cn (T.L.).

### 1. Supplemental tables

**Table S1 Contents of each element analysed by XPS**

| Sample     | C (at%) | O (at%) | N (at%) | S (at%) |
|------------|---------|---------|---------|---------|
| ELC-900    | 89.71   | 8.31    | 1.80    | 0.18    |
| ELC-1-900  | 85.72   | 6.21    | 7.73    | 0.33    |
| ELC-2-900  | 86.31   | 5.32    | 8.32    | 0.14    |
| ELC-4-900  | 84.08   | 5.64    | 10.02   | 0.27    |
| ELC-1-800  | 80.63   | 8.14    | 10.93   | 0.31    |
| ELC-1-1000 | 88.18   | 6.75    | 4.83    | 0.24    |

**Table S2 Comparison of the ORR properties of ELC-1-900 and other nonmetallic catalysts under alkaline conditions**

| Sample                                        | E <sub>1/2</sub> (V) | E <sub>onset</sub> (V) | Reference |
|-----------------------------------------------|----------------------|------------------------|-----------|
| N-S-C 900                                     | 0.83                 | 0.97                   | 1         |
| N-S/C_700                                     | 0.75                 | 0.80                   | 2         |
| Fe <sub>2</sub> -N/CNTs-850 °C                | 0.846                | 0.972                  | 3         |
| Fe <sub>3</sub> C <sub>2</sub> /Mn, N, S-CNTs | 0.85                 | 1.04                   | 4         |
| AL-Ni/Co@GC                                   | 0.81                 | 0.97                   | 5         |
| ELC-1-900                                     | 0.88                 | 0.98                   | This work |

## 2. References

1. Zhang, X. L.; Yu, D. L.; Zhang, Y. Q.; Guo, W. H.; Ma, X. X.; He, X. Q., Nitrogen- and sulfur-doped carbon nanoplatelets via thermal annealing of alkaline lignin with urea as efficient electrocatalysts for oxygen reduction reaction. *RSC ADVANCES* **2016**, 6 (106), 104183-104192.
2. Zhang, M.; Song, Y.; Tao, H.; Yan, C.; Masa, J.; Liu, Y.; Shi, X.; Liu, S.; Zhang, X.; Sun, Z., Lignosulfonate biomass derived N and S co-doped porous carbon for efficient oxygen reduction reaction. *Sustainable Energy & Fuels* **2018**, 2 (8), 1820-1827.
3. Li, C.; Wu, Y.; Fu, M.; Zhao, X.; Zhai, S.; Yan, Y.; Zhang, L.; Zhang, X., Preparation of Fe/N Double Doped Carbon Nanotubes from Lignin in Pennisetum as Oxygen Reduction Reaction Electrocatalysts for Zinc-Air Batteries. *ACS APPLIED ENERGY MATERIALS* **2022**, 5 (4), 4340-4350.
4. Wu, D.-H.; Huang, H.; Ul Haq, M.; Zhang, L.; Feng, J.-J.; Wang, A.-J., Lignin-derived iron carbide/Mn, N, S-codoped carbon nanotubes as a high-efficiency catalyst for synergistically enhanced oxygen reduction reaction and rechargeable zinc-air battery. *Journal of Colloid and Interface Science* **2023**, 647, 1-11.
5. Dong, R.; Yang, Z.; Fu, Y.; Chen, Z.; Hu, Y.; Zhou, Y.; Qin, H., Aminated lignin chelated metal derived bifunctional electrocatalyst with high catalytic performance. *Applied Surface Science* **2022**, 580, 152205.
